# Supplementary material
Source: PubMed Central journal article supplement (PMC4496533)
Supplement: cmi2014106x1.pdf [file cmi2014106x1.pdf]

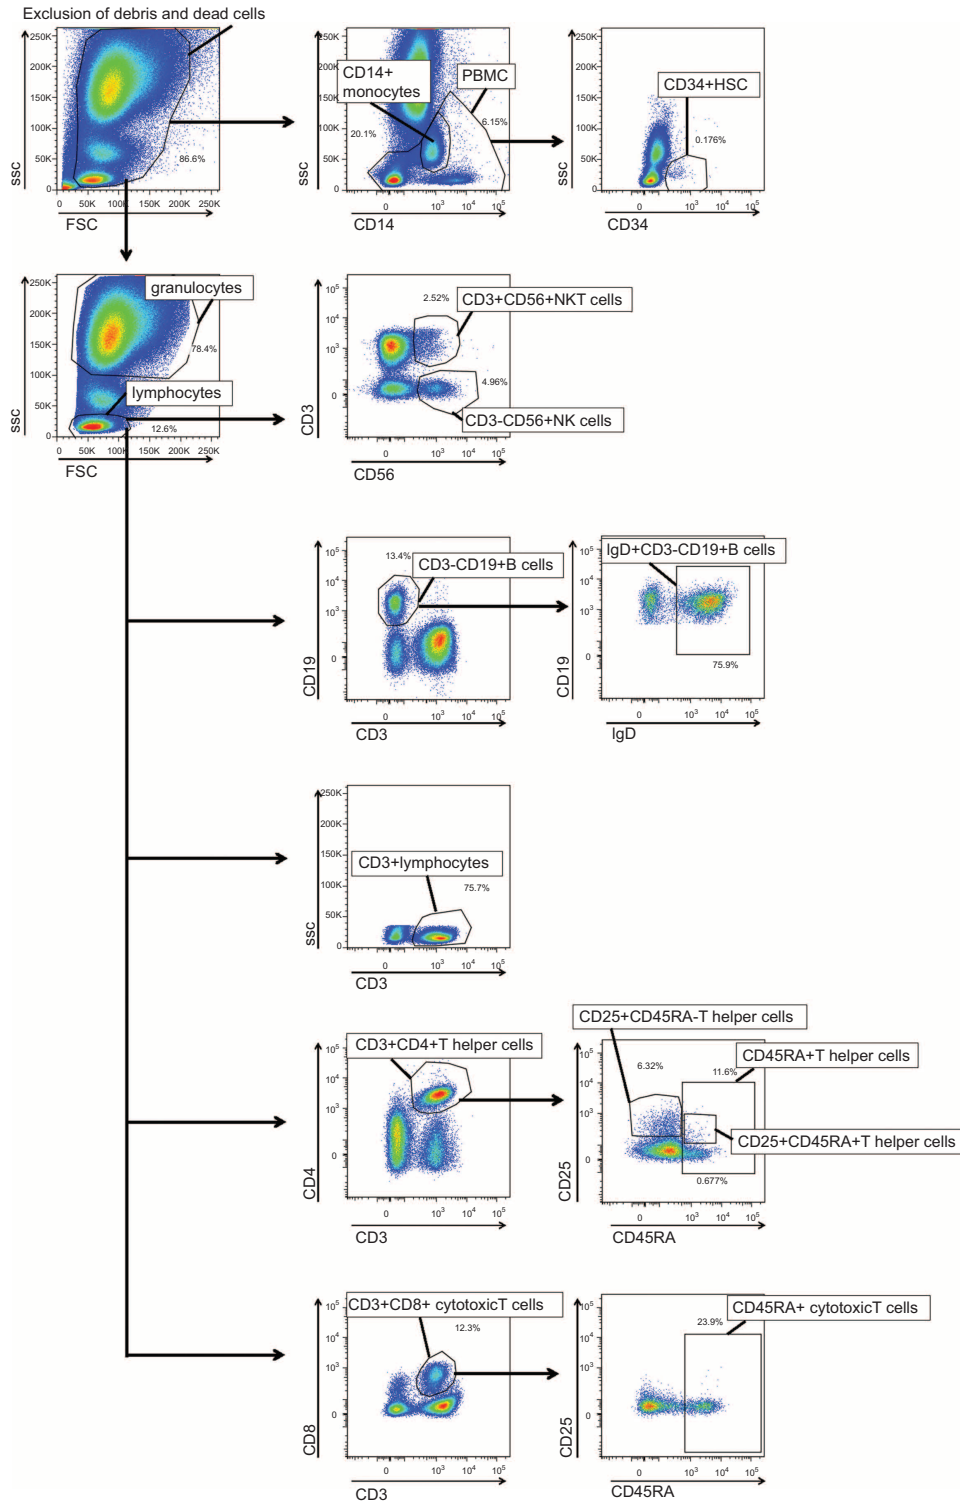

**Supplemental Figure 1** FACS gating strategy. After the exclusion of debris and dead cells, a gate was set on PBMC and CD14<sup>+</sup> monocytes in a CD14/SSC plot. Within the PBMC gate, the CD34<sup>+</sup> HSC were gated in a CD34/SSC plot. Granulocyte and lymphocyte gates were set in a FSC/SSC plot. Within the lymphocyte gate further gates were set on CD56<sup>+</sup>CD3<sup>+</sup> NKT and CD56<sup>+</sup>CD3<sup>-</sup> NK cells in a CD56/CD3 plot. Within the lymphocyte gate, the CD3<sup>-</sup>CD19<sup>+</sup> B cells were gated in a CD3/CD19 plot. Within the CD3<sup>-</sup>CD19<sup>+</sup> B cells, a further gate was set on the IgD<sup>+</sup> cells in a IgD/CD19 plot. Furthermore, within the lymphocyte gate the CD3<sup>+</sup> T cells were gated in a CD3/SSC plot. Within the lymphocyte gate, the T helper cells were gated as CD3<sup>+</sup>CD4<sup>+</sup> in a CD3/CD4 plot. Within the T helper cell population, further gates were set on CD45RA<sup>+</sup>, CD25<sup>-</sup>CD45RA<sup>+</sup> and CD25<sup>+</sup>CD45RA<sup>+</sup> T helper cells. Within the lymphocyte gate, the cytotoxic T cells were gated as CD3<sup>+</sup>CD8<sup>+</sup> in a CD3/CD8 plot. Within the cytotoxic T cell population, a further gate was set on CD45RA<sup>+</sup> cytotoxic T cells.

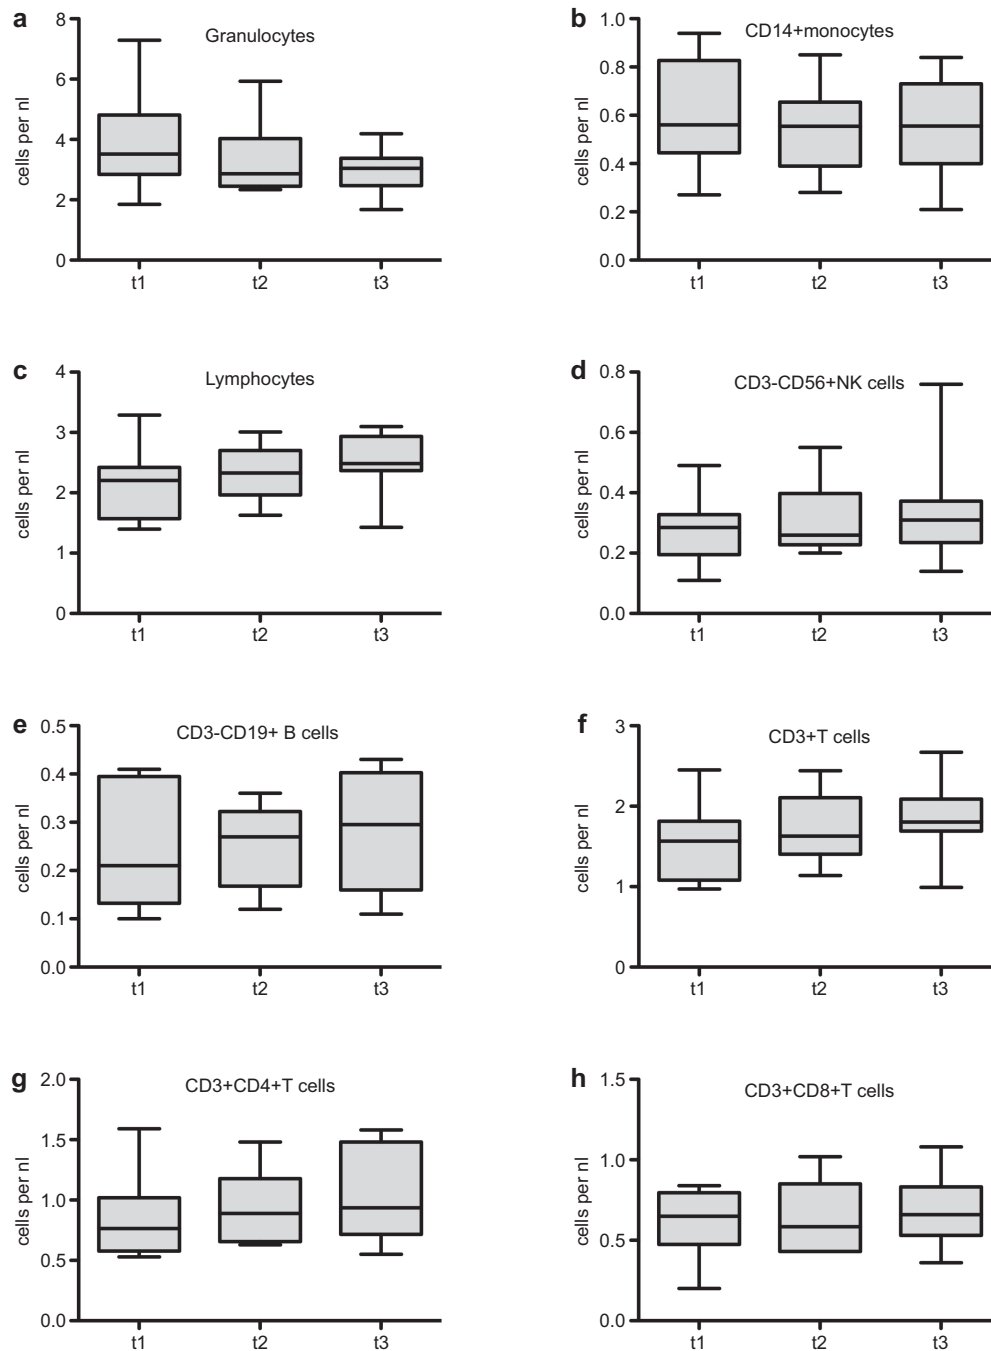

**Supplemental Figure 2** Time-dependent effects in leukocyte subpopulations for a non-bed rest group ( $n=10$ ). Blood samples were drawn on three different time points corresponding to the time gaps between BDC-2, HDT19 and HDT60. Leukocytes were analyzed flow cytometrically according to their morphology and different surface markers. Data are shown as box and whisker plots (box: median and the 25th and 75th percentiles; whiskers: minimum+maximum). No time-dependent differences were found in any of the selected parameters tested (**a**) granulocytes, (**b**) CD14<sup>+</sup> monocytes, (**c**) lymphocytes, (**d**) CD3<sup>-</sup>CD56<sup>+</sup> NK cells, (**e**) CD3<sup>-</sup>CD19<sup>+</sup> B cells, (**f**) CD3<sup>+</sup> T cells, (**g**) CD3<sup>+</sup>CD4<sup>+</sup> T cells and (**h**) CD3<sup>+</sup>CD8<sup>+</sup> T cells. Paired *t*-tests were performed and no significant values were detected.

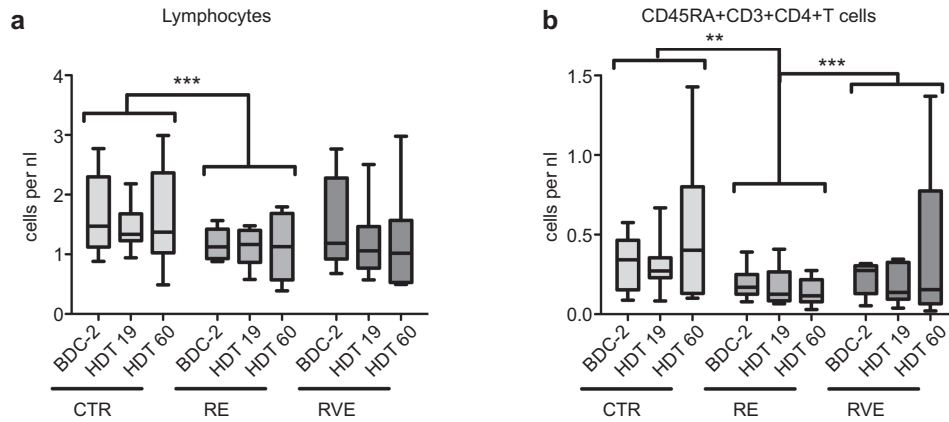

**Supplemental Figure 3** Exercise (RE+RVE pooled *versus* CTR) dependent time effects in leukocyte subpopulations. Blood samples were drawn on BDC-2, HDT19 and HDT60. Leukocytes were analyzed flow cytometrically according to their morphology and different surface markers. Then the cell counts were calculated on the basis of the leukocyte count conducted at the routine hospital laboratory undergoing regular quality controls. Data are shown as box and whisker plots (box: median and the 25th and 75th percentiles; whiskers: minimum + maximum). Exercise-dependent time effects were found in **(a)** lymphocytes and **(b)** CD45RA<sup>+</sup>CD3<sup>+</sup>CD4<sup>+</sup> T cells. Pairwise repeated measurement analyses were performed for the different exercise groups when the overall repeated measurement analysis revealed a significant time effect of exercise type; the statistical analysis refers to the difference in time course, \* $P < 0.05$ , \*\* $P < 0.01$ .

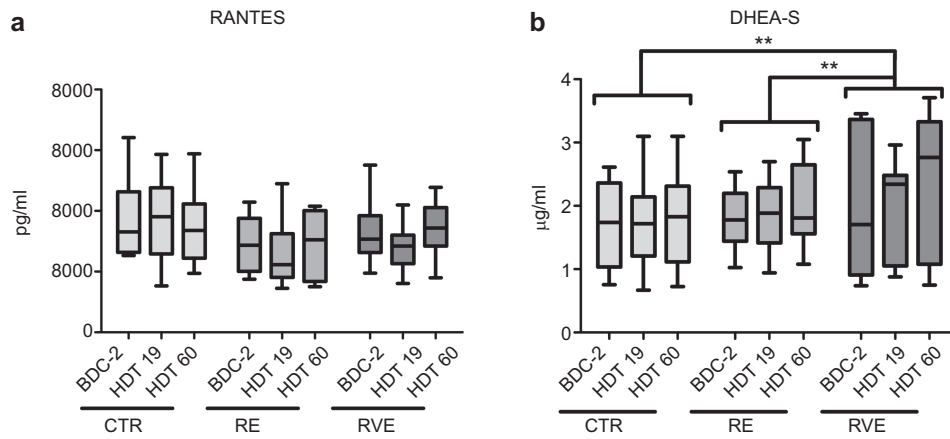

**Supplemental Figure 4** Exercise-dependent time effects in plasma factors. Blood samples were drawn on BDC-2, HDT19 and HDT60. Plasma was analyzed by a multiplex suspension array or ELISA/RIA. Data are shown as box and whisker plots (box: median and the 25th and 75th percentiles; whiskers: minimum+maximum). Exercise-dependent time effects were found in **(a)** RANTES and **(b)** DHEA-S. Pairwise repeated measurement analyses were performed for the different exercise groups when the overall repeated measurement analysis revealed a significant time effect of exercise type; the statistical analysis refers to the difference in time course, \* $P < 0.05$ , \*\* $P < 0.01$ .

**Supplemental Table 1 Distribution of non-smokers and former smokers (prior to the start of the BBR-2 study)**

| Cigarettes/day before bed rest  | Number of subjects |
|---------------------------------|--------------------|
| 0 (non-smokers)                 | 19                 |
| <2 occasionally (not every day) | 3                  |
| 1-5                             | 1                  |
| 5-10                            | 2                  |
| 10-15                           | 0                  |
| 15-20                           | 0                  |
| 20-40                           | 0                  |
| >40                             | 0                  |

**Supplemental Table 2 Subject characteristics of the non-bed rest group**

| Subjects | Age | Size | Weight | BMI  |
|----------|-----|------|--------|------|
| 1        | 40  | 182  | 75     | 22.6 |
| 2        | 25  | 182  | 71     | 21.4 |
| 3        | 34  | 190  | 84     | 23.3 |
| 4        | 41  | 183  | 79     | 24.7 |
| 5        | 42  | 175  | 74     | 24.2 |
| 6        | 27  | 182  | 92     | 27.8 |
| 7        | 29  | 172  | 68     | 23   |
| 8        | 39  | 191  | 107    | 29.3 |
| 9        | 32  | 184  | 80     | 23.6 |
| 10       | 32  | 178  | 80     | 25.2 |

**Supplemental Table 3 Immune cells, cytokines, chemokines and neuroendocrine factors which show time-dependent effects (from BDC-2 to HDT 19 to HDT60) in repeated measurement analyses. The ANOVA was controlled for confounding by subject exercise, age, body mass index, cohort (first, second, third or fourth), smoker before study and interactions between these parameters. The interactions are marked with \*. Confounding factors are listed. Significant *P* values (*P*<0.05) are shown. Where 'exercise' values (bold) or the 'exercise' × 'other confounder' interaction values were significant on repeated measures, additional repeated measures (ANOVAs) comparing individual groups (i.e., CTR *versus* RE, CTR *versus* RVE and RE *versus* RVE) were performed (for results, see Supplementary Figures 3 and 4)**

| Parameters                                                                             | Confounding factors     | <i>P</i> value |
|----------------------------------------------------------------------------------------|-------------------------|----------------|
| Immune cell subpopulations                                                             |                         |                |
| Granulocytes                                                                           |                         | <b>0.028</b>   |
|                                                                                        | Cohort                  | < <b>0.001</b> |
|                                                                                        | Smoker                  | < <b>0.001</b> |
|                                                                                        | Cohort*smoker           | < <b>0.001</b> |
| Lymphocytes                                                                            |                         | <b>0.045</b>   |
|                                                                                        | Cohort                  | < <b>0.001</b> |
|                                                                                        | <b>Exercise</b> *cohort | <b>0.002</b>   |
|                                                                                        | <b>Exercise</b> *smoker | <b>0.010</b>   |
|                                                                                        | Cohort*smoker           | <b>0.002</b>   |
|                                                                                        | BMI                     | <b>0.029</b>   |
| CD14 <sup>+</sup> monocytes                                                            | Cohort                  | <b>0.005</b>   |
| Lymphocyte subpopulations                                                              |                         |                |
| T cells                                                                                |                         |                |
| CD3 <sup>+</sup>                                                                       | Cohort                  | <b>0.034</b>   |
| T helper cells                                                                         |                         |                |
| CD3 <sup>+</sup> CD4 <sup>+</sup> T helper cells                                       | Cohort                  | <b>0.003</b>   |
| CD45RA <sup>+</sup> CD3 <sup>+</sup> CD4 <sup>+</sup> T helper cells                   | <b>Exercise</b>         | <b>0.008</b>   |
|                                                                                        | Cohort                  | < <b>0.001</b> |
|                                                                                        | Smoker                  | <b>0.021</b>   |
|                                                                                        | <b>Exercise</b> *cohort | <b>0.006</b>   |
|                                                                                        | BMI                     | <b>0.045</b>   |
| CD45RA <sup>-</sup> CD25 <sup>+</sup> CD3 <sup>+</sup> CD4 <sup>+</sup> T helper cells | Cohort                  | <b>0.031</b>   |
| <b>Hematopoietic stem cells</b>                                                        |                         |                |
| CD34 <sup>+</sup> HSC                                                                  | Cohort*smoker           | <b>0.027</b>   |
| <b>NK cells</b>                                                                        |                         |                |
| CD3 <sup>-</sup> CD56 <sup>+</sup> NK cells                                            | Cohort                  | <b>0.004</b>   |
| <b>Cytokines and chemokines</b>                                                        |                         |                |
| PDGF                                                                                   | Cohort                  | <b>0.034</b>   |
| RANTES                                                                                 | <b>Exercise</b>         | <b>0.007</b>   |
|                                                                                        | Cohort                  | <b>0.034</b>   |
|                                                                                        | <b>Exercise</b> *smoker | <b>0.029</b>   |
| <b>Neuroendocrine factors</b>                                                          |                         |                |
| DHEA-S                                                                                 | Smoker                  | <b>0.038</b>   |
|                                                                                        | <b>Exercise</b> *cohort | <b>0.017</b>   |
|                                                                                        | Cohort*smoker           | <b>0.046</b>   |
